# Supplementary material for: Lutzomyia longipalpis Antimicrobial Peptides: Differential Expression during Development and Potential Involvement in Vector Interaction with Microbiota and Leishmania
Source: MDPI journal article supplement (doi:10.3390/microorganisms9061271), 2021-06-11
Supplement: s1 [file s1]

**Supplementary Materials:** The following are available online at [www.mdpi.com/xxx/s1](http://www.mdpi.com/xxx/s1).

**Table S1:** Primers

| Reference                                      | Name              | Sequence                                                        |
|------------------------------------------------|-------------------|-----------------------------------------------------------------|
| GenBank:<br>KP030755                           | dsAtt-F           | <u>TAATACGACTCACTATAGGGAGACATCTATTGGTGGTGGGCTC</u> <sup>1</sup> |
|                                                | dsAtt-R           | <u>TAATACGACTCACTATAGGGAGAGCGATGAGAAAGACCAAGT</u> <sup>1</sup>  |
| GenBank:<br>KP030758                           | dsDef2-F          | <u>TAATACGACTCACTATAGGGAGAGTTGTTGTTGTTGTTGGAGT</u> <sup>1</sup> |
|                                                | dsDef2-R          | <u>TAATACGACTCACTATAGGGAGAAATCCATGTCCGATGCAA</u> <sup>1</sup>   |
| Adapted from<br>Molina-Cruz <i>et al.</i> 2008 | dsLacZ-F          | <u>TAATACGACTCACTATAGGGAGATATCCGCTCACAATTCCACA</u> <sup>1</sup> |
|                                                | dsLacZ-R          | <u>TAATACGACTCACTATAGGGAGAGATCAGTGAGCGAGGAAGC</u> <sup>1</sup>  |
| Tinoco-Nunes <i>et al.</i> 2016                | rtAtt-F           | ATGGGCATGGCAGCGTCTCT                                            |
|                                                | rtAtt-R           | AGGCTGATCCTCTGGGTCCTGT                                          |
| Tinoco-Nunes <i>et al.</i> 2016                | rtCec-F           | TGGCAGTCCTGACCACTGGA                                            |
|                                                | rtCec-R           | CTTCTCCACTGAACGGTGAACG                                          |
| GenBank:<br>EF491251                           | rtDef1-F          | GCTGCAAATCCTGCAAAGA                                             |
|                                                | rtDef1-R          | CCCAAGGAGGTCACAGGTTA                                            |
| Tinoco-Nunes <i>et al.</i> 2016                | rtDef2-F          | ATCCATCCTTTATGCAACCG                                            |
|                                                | rtDef2-R          | GCCTTTGAGTCGCAGTATCC                                            |
| GenBank:<br>MW269862                           | rtDef3-F          | GACTCTTTGCGATTGGAGGA                                            |
|                                                | rtDef3-R          | ATCCACCACTGAAGCCCTTA                                            |
| GenBank:<br>MW269863                           | rtDef4-F          | TGAAGAGATTCCTGAAGCACC                                           |
|                                                | rtDef4-R          | CCACCCTTATGTCCAAGAGC                                            |
| Meireles-Filho <i>et al.</i> 2008              | rtRP49-F          | GACCGATATGCCAAGCTAAAGCA                                         |
|                                                | rtRP49-R          | GGGGAGCATGTGGCGTGTCTT                                           |
| Di-Blasi <i>et al.</i> 2015                    | LeishActin-F      | GTCGTGATAAAGCCGAAGGTGGTT                                        |
|                                                | LeishActin-R      | TTGGGCCAGACTCGTCGTA CTGCT                                       |
| Yang <i>et al.</i> 2002                        | Bac16S-F (P891F)  | TGGAGCATGTGGTTTAATTCTGA                                         |
|                                                | Bac16S-R (P1033R) | TGCGGGACTTAACCCAACA                                             |

<sup>1</sup> Underlined nucleotides correspond to T7 adaptor for RNA polymerase binding.

**Table S2:** Similarities shared between *L. longipalpis* defensin amino acid sequences

|      | Def2             | Def4             | Def1             | Def3             |
|------|------------------|------------------|------------------|------------------|
| Def2 | n/a <sup>1</sup> | 40.82 %          | 39.18 %          | 30.61 %          |
| Def4 | 40.82 %          | n/a <sup>1</sup> | 53.93 %          | 36.67 %          |
| Def1 | 39.18 %          | 53.93 %          | n/a <sup>1</sup> | 70.45 %          |
| Def3 | 30.61 %          | 36.67 %          | 70.45 %          | n/a <sup>1</sup> |

<sup>1</sup> not applicable

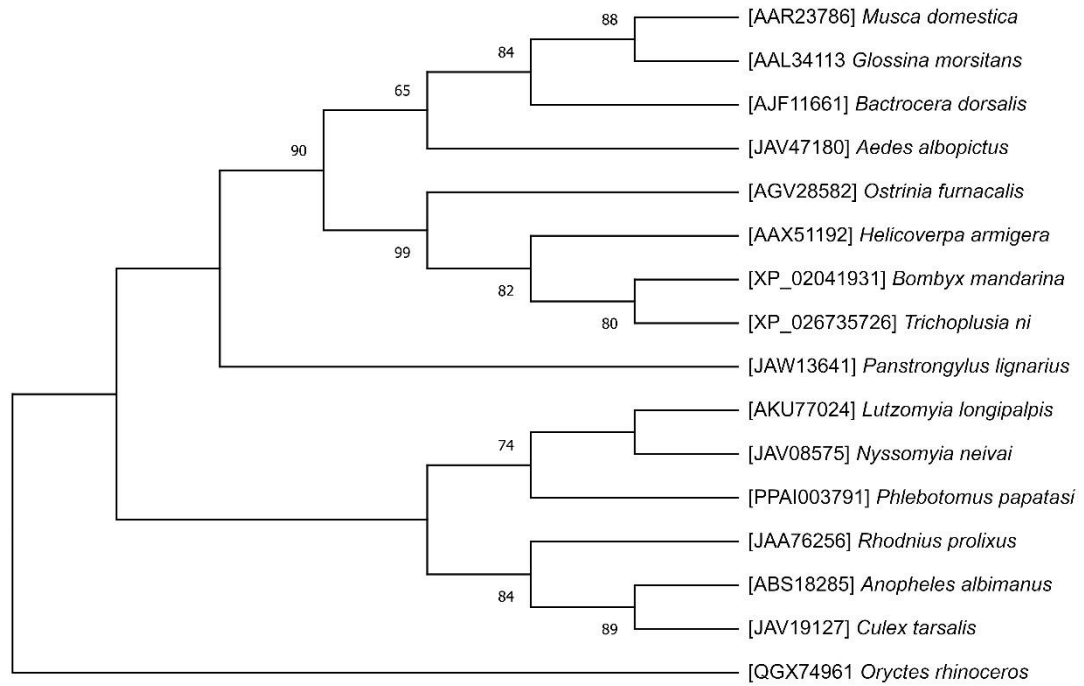

**Figure S1:** Phylogram of attacin amino acid sequences: Phylogram was constructed with *L. longipalpis* and other insects attacin sequences inferred by Maximum Likelihood method. Numbers on branch nodes indicate bootstrap values higher than 50%. Branch lines are followed by GenBank or Vector Base accession number and species names.



**Figure S3:** Amino acid sequences of *L. longipalpis* defensins: Name of sequences are indicated on the left side and position of residues are indicated by numbers above the sequences. Predicted signal peptide regions are underlined. Residues sharing higher similarity are shaded in black and lower similarity in grey. Six conserved cysteine residues from defensin family are indicated by asterisks.

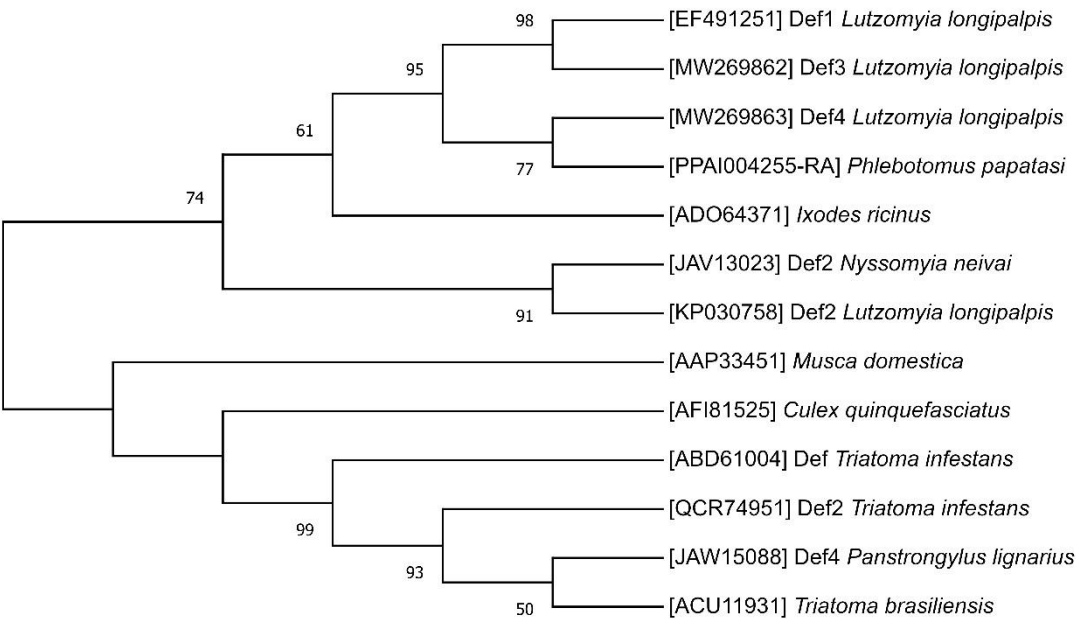

**Figure S4:** Phylogram of defensin amino acid sequences: Phylogram was constructed with *L. longipalpis* and other insects defensin sequences inferred by Maximum Likelihood method. Numbers on branch nodes indicate bootstrap values equal or higher than 50%. Branch lines are followed by GenBank or Vector Base accession number, defensin name (when more than one defensin sequence was identified in a single species), and species names.

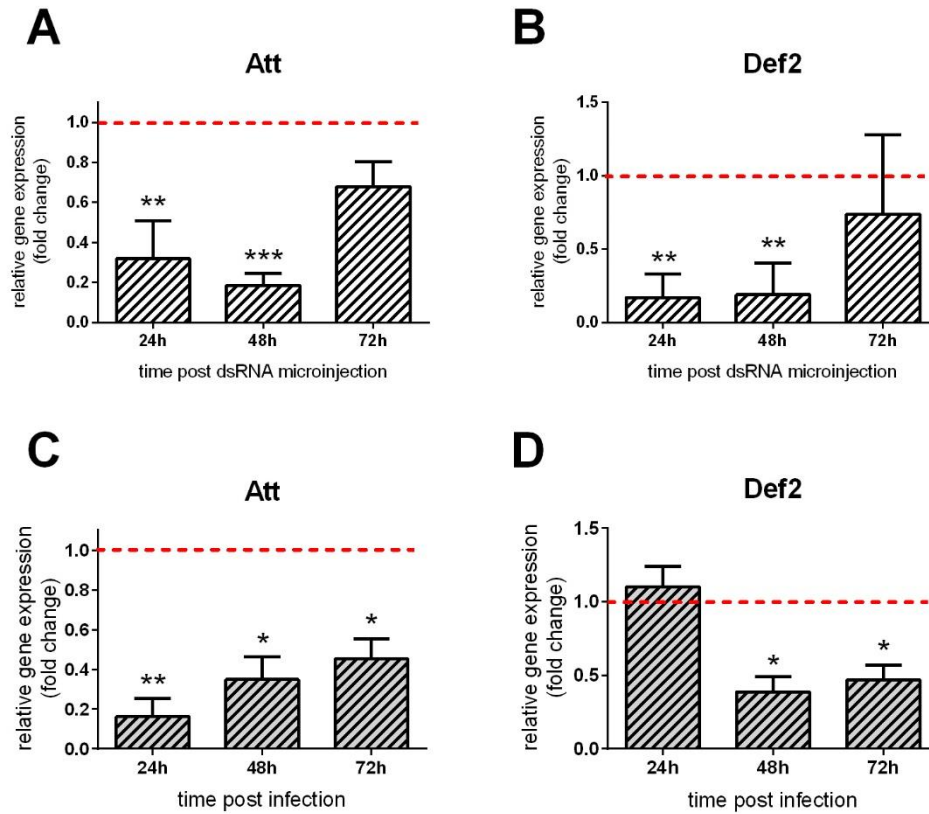

**Figure S5: Relative gene expression of AMPs in dsRNA injected female sand flies.** (A and B) gene expression in dsRNA injected and fed on sucrose. (C and D) gene expression in dsRNA injected and infected with *Leishmania*. (A and C) attacin expression in Att-dsRNA injected; (B and D) defensin 2 expression in Def2-dsRNA injected. Y-axis represents relative gene expression as fold change values in comparison to the control group injected with LacZ dsRNA. X-axis represents time post dsRNA microinjection in insect thorax (A and B), or post infection (C and D). Vertical bars represent the average values of three independent experiments, and error bars represent the standard error. Two-way ANOVA test were carried for significant differences (\*  $p < 0.05$ ; \*\*  $p < 0.01$ ; \*\*\*  $p < 0.001$ ).
